# Supplementary material for: Cell-binding peptides on the material surface guide stem cell fate of adhesion, proliferation and differentiation
Source: Royal Society of Chemistry journal article supplement (doi:10.1039/d2tb02601e), 2023-01-01
Supplement: d2tb02601e1.pdf [file d2tb02601e1.pdf]

## Cell-binding peptides on the material surface guide stem cell fate of adhesion, proliferation and differentiation

Tzu-Cheng Sung,<sup>‡a</sup> Ting Wang,<sup>‡a</sup> Qian Liu,<sup>‡a</sup> Qing-Dong Ling,<sup>b</sup> Suresh Kumar Subbiah,<sup>c</sup> Remya Rajan Renuka,<sup>c</sup> Shih-Tien Hsu,<sup>d</sup> Akihiro Umezawa<sup>e</sup> and Akon Higuchi<sup>\*a,f,g</sup>

<sup>a</sup>School of Ophthalmology and Optometry, Eye Hospital, Wenzhou Medical University, No. 270, Xueyuan Road, Wenzhou, Zhejiang, 325027, China

<sup>b</sup>Cathay Medical Research Institute, Cathay General Hospital, No. 32, Ln 160, Jian-Cheng Road, Hsi-Chi City, Taipei 221, Taiwan

<sup>c</sup>Centre for Materials Engineering and Regenerative Medicine, Bharath Institute of Higher Education and Research, 173, Agaram Road, Tambaram East, Chennai-73, 600078, India

<sup>d</sup>Department of Internal Medicine, Taiwan Landseed Hospital, 77, Kuangtai Road, Pingjen City, Taoyuan 32405, Taiwan

<sup>e</sup>Department of Reproduction, National Center for Child Health and Development, 2-10-1 Okura, Setagaya-ku, Tokyo, 157-8535, Japan

<sup>f</sup>Department of Chemical and Materials Engineering, National Central University, No. 300, Jhongda RD., Jhongli, Taoyuan 32001, Taiwan

<sup>g</sup>R&D Center for Membrane Technology, Chung Yuan Christian University, Chungli, Taoyuan 320, Taiwan

\* Correspondence author. Department of Chemical and Materials Engineering, National Central University, No. 300, Jhongda RD., Jhongli, Taoyuan 32001, Taiwan & School of Ophthalmology and Optometry, Eye Hospital, Wenzhou Medical University, No. 270, Xueyuan Road, Wenzhou, Zhejiang, 325027, China

Tel.: +86 577-88068822; fax: +86 086-577-88832083.

E-mail address: [higuchi@ncu.edu.tw](mailto:higuchi@ncu.edu.tw); [higuchi@wmu.edu.cn](mailto:higuchi@wmu.edu.cn) (A. Higuchi)

<sup>‡</sup> These authors contributed equally to this work.

## Supplementary Information

Supplementary Table 1-1. Peptide sequences derived from laminin.<sup>72,87-92</sup>

| Origin of ECM domain                                      | Peptide sequences                     | Ref. |
|-----------------------------------------------------------|---------------------------------------|------|
| Laminin-derived RGD containing peptide (abbreviated name) |                                       |      |
| Laminin $\alpha$ 1                                        | GGGG-TFAL <b>RGD</b> NP ( $\alpha$ 1) | 87   |
| Laminin $\alpha$ 1                                        | GTFAL <b>RGD</b> NP ( $\alpha$ 1-1)   | 87   |
| Laminin $\alpha$ 1                                        | FAL <b>RGD</b> NP (PA26)              | 87   |
| Laminin $\alpha$ 1                                        | CGG-AGTFAL <b>RGD</b> NPQG (A99)      | 89   |
| Laminin $\alpha$ 1                                        | QAGTFAL <b>RGD</b> NPQG (A99)         | 87   |
| Laminin $\alpha$ 1                                        | CQAGTFAL <b>RGD</b> NPQG              | 72   |
| Laminin $\alpha$ 1                                        | GGGG-DVEK <b>RGD</b> REEAHVP          | 88   |
| Laminin $\alpha$ 3                                        | GGGG-IQ <b>RGD</b> IDAMIS             | 88   |
| Laminin $\alpha$ 4                                        | GGGG-DAVKQLQAA <b>ERGDA</b>           | 88   |
| Laminin $\alpha$ 5                                        | GGGG-SETQ <b>RGD</b> VFVP             | 88   |
| Laminin $\alpha$ 5                                        | GGGG-PASY <b>RGD</b> SC               | 88   |
| Laminin $\alpha$ & other<br>ECMs                          | GCGYGR <b>RGD</b> SPG                 | 90   |
| Laminin $\alpha$                                          | <b>RGD</b> SPK                        | 91   |
| Laminin $\beta$ 4                                         | GGGG-PMQKMR <b>RGD</b> VFSP           | 88   |
| Laminin $\gamma$ 2                                        | GGGG- <b>RGD</b> GTG                  | 88   |
| Laminin $\gamma$ 3                                        | GGGGEAP <b>RGD</b> VYQG               | 88   |
| Unknown                                                   | DGEA <b>RGD</b> SPKRSR                | 92   |

Supplementary Table 1-2. Peptide sequences derived from ECM proteins.<sup>57,72,87,90-103</sup>

| Origin of ECM domain                                        | Peptide sequences                    | Ref.    |
|-------------------------------------------------------------|--------------------------------------|---------|
| Laminin-derived IKVAV containing peptide (abbreviated name) |                                      |         |
| Laminin $\alpha$ 1                                          | <b>IKVAV</b>                         | 93      |
| Laminin $\alpha$ 1                                          | <b>SIKVAV</b>                        | 87      |
| Laminin $\alpha$ 1                                          | KYGAAS <b>IKVAVSADR</b>              | 94      |
| Laminin $\alpha$ 1                                          | GCGYG <b>IKVAV</b>                   | 90      |
| Laminin $\alpha$ 1                                          | CCRR <b>IKVAV</b> WLC (cyclic IKVAV) | 57      |
| Laminin $\alpha$ 1                                          | CSRARKQAAS <b>IKVAVSADR</b>          | 57, 95  |
| Laminin $\alpha$ 1                                          | (RADA)4-GGS <b>IKVAV</b>             | 96      |
| Laminin $\alpha$ 1                                          | (RADA)4-GG <b>IKVAV</b>              | 97      |
| Laminin $\alpha$ 1                                          | <b>CIKVAV</b>                        | 98      |
| Laminin $\alpha$ 1                                          | <b>CIKVAVS</b>                       | 72      |
| Laminin $\alpha$ 1                                          | AS <b>IKVAVSADR</b>                  | 91      |
| Laminin $\alpha$ 1                                          | CRKQAAS <b>IKVAVS</b> (D12)          | 72      |
| Laminin $\alpha$ 1                                          | <b>GIIKVAV</b>                       | 99, 100 |
| Laminin $\alpha$ 1                                          | GCGYG <b>IKVAVADR</b>                | 90      |
| Laminin $\alpha$ 1                                          | (RADA)4GGS <b>IKVAV</b>              | 101     |
| Laminin $\alpha$ 1                                          | (RADA)4 <b>IKVAV</b>                 | 97      |
| Laminin $\alpha$ 1                                          | <b>YIGSRWYQNMIRIKVAV</b>             | 92      |
| Laminin $\alpha$ 1                                          | QHREDGS <b>YIGSRIKVAV</b>            | 92      |
| Laminin $\alpha$ 1                                          | WQPPRARI <b>YIGSRIKVAV</b>           | 92      |
| Laminin $\alpha$ 1                                          | A4G3D2 <b>IKVAV</b>                  | 102     |
| Laminin $\alpha$ 1                                          | CSRARKQAAS <b>IKVAVSADR</b>          | 103     |

Supplementary Table 1-3. Peptide sequences derived from ECM proteins.<sup>89,91,98,104,105,111,112</sup>

| Origin of ECM domain                                       | Peptide sequences          | Ref.    |
|------------------------------------------------------------|----------------------------|---------|
| Laminin $\alpha$ chain-derived peptides (abbreviated name) |                            |         |
| Laminin $\alpha$ 1                                         | CGG-TWYKIAFQRNRK           | 98      |
| Laminin $\alpha$ 1                                         | CIKLLI                     | 98      |
| Laminin $\alpha$ 1                                         | CGG-NRWHSIYITRFG (AG10)    | 98      |
| Laminin $\alpha$ 1                                         | NRWHSIYITRFG (AG10)        | 91, 112 |
| Laminin $\alpha$ 1                                         | AASIKVAVSADR (LAM-L)       | 112     |
| Laminin $\alpha$ 1                                         | SSFHFDGSGYAM (AG22)        | 112     |
| Laminin $\alpha$ 1                                         | TWYKIAFQRNRK(AG32)         | 111     |
| Laminin $\alpha$ 1                                         | SLVRNRRVITIQ (AG-56)       | 91, 112 |
| Laminin $\alpha$ 1                                         | CGG-RKRLQVQLSIRT (AG73)    | 89      |
| Laminin $\alpha$ 1                                         | RKRLQVQLSIRT (AG73)        | 91      |
| Laminin $\alpha$ 1                                         | CGG-RLQLQEGRLHFXFD (X=Nle) | 89      |
| Laminin $\alpha$ 1                                         | CGG-NRWHSIYITRFG (AG10)    | 89      |
| Laminin $\alpha$ 2                                         | YHYVTITLDLQQ (A2-8)        | 111     |
| Laminin $\alpha$ 2                                         | YYDETVASRNLSLN (A2-31)     | 111     |
| Laminin $\alpha$ 2                                         | MIIFEGNDLRIS (A2-56)       | 111     |
| Laminin $\alpha$ 2                                         | TNLERVLMQITYN (A2-63)      | 111     |
| Laminin $\alpha$ 2                                         | GGKLYAIYFEA (A2-112)       | 111     |
| Laminin $\alpha$ 2                                         | DILYDIHYILIK (A2-122)      | 111     |
| Laminin $\alpha$ 2                                         | ARLEQMTMNINL (A2-144)      | 111     |
| Laminin $\alpha$ 2                                         | ANRLLGEINSVI (A2-176)      | 111     |
| Laminin $\alpha$ 2                                         | AKNISFNATAAF (A2-185)      | 111     |
| Laminin $\alpha$ 3                                         | PPFLMLLKGSTR               | 104     |
| Laminin $\alpha$ 5                                         | ASKAIQFLLGG                | 105     |
| Laminin $\alpha$ 5                                         | QQNLGSVNVSTG               | 105     |
| Laminin $\alpha$                                           | SINNNR                     | 91      |

Supplementary Table 1-4. Peptide sequences derived from ECM proteins.<sup>72,87,90,91,93,97,98,106,107,109,110,113</sup>

| Origin of ECM domain                                                | Peptide sequences          | Ref.       |
|---------------------------------------------------------------------|----------------------------|------------|
| Laminin-derived $\beta$ chain containing peptide (abbreviated name) |                            |            |
| Laminin $\beta$ 1                                                   | <b>YIGSR</b>               | 72, 87, 93 |
| Laminin $\beta$ 1                                                   | <b>GYIGSRY</b>             | 106        |
| Laminin $\beta$ 1                                                   | <b>EGGYIGSR</b>            | 109        |
| Laminin $\beta$ 1                                                   | <b>GCGYGYIGSR</b>          | 90         |
| Laminin $\beta$ 1                                                   | <b>CDPGYIGSR</b> (p31)     | 113        |
| Laminin $\beta$ 1                                                   | <b>DCDPGYIGSR</b> (p31-A)  | 107        |
| Laminin $\beta$ 1                                                   | <b>SDPGYIGSR</b>           | 90         |
| Laminin $\beta$ 1                                                   | <b>(RADA)4-GGSDPGYIGSR</b> | 97         |
| Laminin $\beta$ 1                                                   | <b>SDPGYIGSR</b>           | 91         |
| Laminin $\beta$ 1                                                   | <b>(RADA)4GGYIGSR</b>      | 110        |
| Laminin $\beta$ 1                                                   | <b>CRYVVLPR</b>            | 98         |
| Laminin $\beta$ 2                                                   | <b>CRNIAEIIKDI</b>         | 98         |
| Laminin $\beta$                                                     | <b>GRYVVLPR</b>            | 91         |
| Laminin $\beta$                                                     | <b>LGTIPG</b>              | 91         |
| Laminin $\beta$                                                     | <b>PDSGR</b>               | 91         |
| Laminin $\beta$                                                     | <b>PDSGR</b>               | 72         |

Supplementary Table 1-5. Peptide sequences derived from ECM proteins.<sup>87,89,91,97-100,107,108,114</sup>

| Origin of ECM domain                                                                   | Peptide sequences            | Ref. |
|----------------------------------------------------------------------------------------|------------------------------|------|
| <b>Laminin-derived <math>\gamma</math> chain containing peptide (abbreviated name)</b> |                              |      |
| Laminin $\gamma$ 1                                                                     | CDITYVRLKF                   | 98   |
| Laminin $\gamma$ 1                                                                     | CGG-KAFDITYVRLKF             | 89   |
| Laminin $\gamma$ 1                                                                     | CGG-KAFDITYVRLKF             | 98   |
| Laminin $\gamma$ 1                                                                     | CDIRVTLNRL                   | 98   |
| Laminin $\gamma$ 1                                                                     | CTTVKYIFR                    | 98   |
| Laminin $\gamma$<br>Laminin $\gamma$ (modified)                                        | TSIKIRGTYS<br>DFKLFVAVY      | 91   |
| Laminin $\gamma$                                                                       | DRNIAEIIKDIC (p20-A)         | 107  |
| Laminin $\gamma$                                                                       | RNIAEIIKDI (p20)             | 114  |
| Laminin $\gamma$                                                                       | (APGVGV)12RNIAEIIKDI (E-p20) | 108  |
| Laminin $\gamma$                                                                       | RNIAEIIKDI                   | 91   |
| Laminin $\gamma$                                                                       | DITYVRLKF                    | 91   |
| Laminin $\gamma$                                                                       | DIRVTLNRL                    | 91   |
| Laminin $\gamma$                                                                       | TTVKYIFR                     | 91   |
| <b>Laminin-derived peptide</b>                                                         |                              |      |
| Laminin                                                                                | (RADA)4-GGPDSGR              | 97   |
| Laminin                                                                                | <b>LREGGGC</b>               | 99   |
| Laminin                                                                                | <b>LREGGGC</b>               | 100  |
| Laminin                                                                                | SIYITRF                      | 87   |
| Laminin                                                                                | IAFQRN                       | 87   |
| Laminin                                                                                | AGQWHRVSVRWG                 | 87   |
| Laminin                                                                                | TWSQKALHHRVP                 | 87   |

Supplementary Table 2. Peptide sequences derived from vitronectin and fibronectin.<sup>86,88,94,98,105</sup>

| Origin of ECM domain                       | Peptide sequences         | Ref. |
|--------------------------------------------|---------------------------|------|
| Vitronectin & fibronectin-derived peptides |                           |      |
| BSP (vitronectin)                          | KGGNGE <b>RGD</b> TYRAY   | 94   |
| BSP (vitronectin)                          | NGE <b>RGD</b> TYRAY      | 94   |
| Vitronectin                                | KGGPQV <b>TRGD</b> VFTMP  | 94   |
| Vitronectin                                | PQV <b>TRGD</b> VFTMP     | 88   |
| Vitronectin                                | <b>TRGD</b> VFT           | 88   |
| Vitronectin                                | CKGGPQV <b>TRGD</b> VFTMP | 98   |
| Vitronectin                                | CGKKQRFRRHRNRKG           | 98   |
| Fibronectin (sFN)                          | <b>GRGD</b> SPK           | 94   |
| Fibronectin (IFN)                          | KGGAV <b>TGRGD</b> SPASS  | 94   |
| Fibronectin & Other ECM                    | <b>RGD</b> SP             | 88   |
| Fibronectin                                | VT <b>GRGD</b> SPAS       | 88   |
| Fibronectin                                | PHSRN <b>RGD</b> SP       | 105  |
| Fibronectin                                | <b>GRGD</b> SP            | 105  |
| Fibronectin                                | GGGG- <b>RGD</b> SG       | 88   |
| Fibronectin & Other ECM                    | GGGG- <b>RGD</b> S        | 88   |
| Fibronectin & Other ECM                    | GGGG- <b>RGD</b>          | 88   |
| Fibronectin                                | <b>GRGD</b> SF            | 86   |
| Fibronectin                                | <b>CRGD</b> S             | 98   |
| Fibronectin                                | CGWQP <b>PRARI</b>        | 98   |
| Fibronectin                                | CDRVRHSR <b>NSIT</b>      | 98   |
| Fibronectin                                | CPHSRN                    | 98   |
| Fibronectin                                | PHSRN                     | 105  |
| Fibronectin                                | S <b>PPRRARVT</b>         | 105  |
| Fibronectin                                | WQP <b>PRARI</b>          | 105  |
| Fibronectin                                | KNNQKSE <b>PLIGR</b> KKT  | 105  |

Supplementary Table 3. Peptide sequences derived from ECM proteins.<sup>83,97,98,108,115-124</sup>

| Origin of ECM domain                        | Peptide sequences            | Ref.    |
|---------------------------------------------|------------------------------|---------|
| <b>Collagen-derived peptides</b>            |                              |         |
| Collagen I                                  | <b>GGDGEA</b>                | 97      |
| Collagen I                                  | <b>CDGEA</b>                 | 98      |
| Collagen I                                  | GFOGER                       | 83      |
| Collagen IV                                 | <b>GGPRGDSGYRGDSG</b>        | 97      |
| Collagen I                                  | <b>GGFPGERGVVEGPGP</b>       | 97      |
|                                             |                              |         |
| <b>Other peptides</b>                       |                              |         |
|                                             | <b>GGRGDS</b>                | 97      |
| R-peptide                                   | <b>GRKKRRQRRRGGRGD</b>       | 115     |
| Heparin binding peptide (HBP)               | <b>GGGGSPRRARVTY</b>         | 124     |
| E7 peptide                                  | <b>EPLQLKM</b>               | 116     |
| Cyclic RGD                                  | <b>GRGDfE</b>                | 117     |
| Heparin binding domain                      | <b>KRSR</b>                  | 118     |
| Enamel matrix derivative                    | <b>WYQNMIR</b>               | 119     |
| Angiopoietin-1 peptide                      | <b>QHREDGS</b>               | 123     |
| Elastin-like peptide                        | <b>(APGVGV)<sub>12</sub></b> | 108     |
| Laminin-derived Bone marrow homing peptides | <b>GGSKPPGTSS (BMHP2)</b>    | 97, 122 |
| Laminin-derived Bone marrow homing peptides | <b>GGPFSSTKT (BMHP1)</b>     | 97, 122 |
| Peptide for bone marrow purification        | <b>GGFLGFPT</b>              | 97      |
| Osteocalcin peptide                         | <b>GHK</b>                   | 120     |
| Artificial peptide                          | <b>Cyclo(-RGDyK)</b>         | 121     |



Supplementary Table 4. Peptide sequences derived from ECM proteins.<sup>86,100,101,110,125-136</sup>

| Origin of ECM domain                   | Peptide sequences                    | Ref.     |
|----------------------------------------|--------------------------------------|----------|
| Miscellaneous peptides                 |                                      |          |
| Collagen binding peptide (Osteopontin) | GLRSKSKKFRRPDIQYPDATDEDITSHM         | 125      |
| Fibronectin binding peptide            | GGWSHW                               | 134      |
| Fibronectin binding peptide            | GGWSHWSPWSS                          | 134, 135 |
| Fibronectin binding peptide            | KRFKQDGGWSHWSP                       | 134, 135 |
| Fibronectin binding peptide            | KRFKQDGGWSHWSPWSS                    | 135      |
| Laminin binding peptide                | IPCNNKGAHSVGLMWWMLAR                 | 136      |
| Tenascin-C                             | VFDNFVLK                             | 86       |
| N-cadherin peptide                     | <b>HAVDI</b>                         | 126      |
| N-cadherin peptide                     | <b>HAVDIGGGC</b>                     | 128      |
| N-cadherin peptide                     | <b>VVAGKKGHAV</b>                    | 127      |
| Self-assembling peptide (RADA16-I)     | (RADA)4                              | 101, 110 |
| Calcium Phosphate nucleating peptide   | EEGGC                                | 130      |
| Cationic antimicrobial peptide         | LLGDFFRKSKEKIGKEFKRIVQRIKDFLRNLPRTES | 129      |
| Bone sialoprotein                      | CGNGEPRGDTYRAY                       | 131      |
| Bone forming peptide - 1               | CGQGFSYPYKAVFSTQ                     | 131      |
| Bone forming peptide - 1 from BMP-7    | GQGFSYPYKAVFSTQ                      | 132, 133 |
| Biodegrading peptide (MMP)             | GPQGIWGQ                             | 100      |

Supplementary Table 5. Peptide sequences derived from growth factors.<sup>105,137-144</sup>

| Origin of ECM domain         | Peptide sequences                    | Ref.     |
|------------------------------|--------------------------------------|----------|
| Peptides from growth factors |                                      |          |
| FGF-2                        | ANRYLAMKEDGRLLAS (FGF2-001, hexafin) | 105      |
| FGF-2                        | ERGVSISIKGV (FGF2-002)               | 105      |
| FGF-2                        | WYVALKRTGQYKLG (FGF2-003, dekafin)   | 105      |
| FGF-2                        | HFKDPKRLYCK (FGF2-004, canofin)      | 105      |
| FGF-2                        | FLPMSAKS (FGF2-005, canofin)         | 105      |
| FGF-2                        | KTGPGQKAIL (FGF2-006, canofin)       | 105      |
| FGF-2                        | YRSRKYSSWYVALKR                      | 142      |
| TGF- $\beta$ 1               | LIANAK (cytomodulin-2)               | 144      |
| TGF- $\beta$ 1               | LIANAK (Cytomodulin-10)              | 137      |
| BMP-2                        | KIPKA SSVPT ELSAI STLYL SGGC         | 140      |
| BMP-2                        | CKIPKA SSVPT ELSAI STLYL             | 138, 141 |
| BMP-9                        | CGG-KVGKACCVPTKLSPISVLYK             | 139, 143 |

Supplementary Table 6 Integrin receptors and their binding ECM proteins.<sup>87,151</sup>

| Integrin receptor    | ECM proteins                                                |
|----------------------|-------------------------------------------------------------|
| $\alpha 1\beta 1$    | Collagen                                                    |
| $\alpha 2\beta 1$    | Collagen, Laminin                                           |
| $\alpha 3\beta 1$    | Collagen, Fibronectin, Laminin                              |
| $\alpha 4\beta 1$    | Fibronectin, Laminin, VCAM                                  |
| $\alpha 5\beta 1$    | Fibronectin                                                 |
| $\alpha 6\beta 1$    | Laminin                                                     |
| $\alpha V\beta 1$    | Fibronectin                                                 |
| $\alpha L\beta 2$    | ICAM-1, ICAM-2                                              |
| $\alpha M\beta 2$    | Fibrinogen, ICAM-1, Factor X                                |
| $\alpha IIIb\beta 3$ | Fibronectin, Vitronectin, Fibrinogen, von Willebrand factor |
| $\alpha V\beta 3$    | Fibronectin, Vitronectin, von Willebrand factor             |
| $\alpha V\beta 5$    | Fibronectin, Vitronectin                                    |
| $\alpha V\beta b$    | Fibronectin                                                 |

Supplementary Table 7 Six highly conserved RGD-containing sequences from laminin and RGD-containing sequence.<sup>87</sup>

| Origin of ECM chain | Abbreviation  | Peptide sequences |
|---------------------|---------------|-------------------|
| Laminin- $\alpha 1$ | $\alpha 1-1$  | G-TFALRGDNP       |
| Laminin- $\alpha 1$ | $\alpha 1-1h$ | G-TFALRADNP       |
| Laminin- $\alpha 3$ | $\alpha 3$    | GIQRGDID          |
| Laminin- $\alpha 4$ | $\alpha 4$    | LQAAERGDA         |
| Laminin- $\alpha 5$ | $\alpha 5-1$  | YELHSETQRGD       |
| Laminin- $\alpha 5$ | $\alpha 5-2$  | YRGDS             |
| Laminin- $\beta 4$  | $\beta 4$     | RGDVFSPPGMVHG     |

Supplementary Table 8 Peptides derived from bacterial phage library, which bind to  $\alpha 6$  integrin of hESCs.<sup>60</sup>

| Abbreviation | Morphology | Peptide sequences |
|--------------|------------|-------------------|
| 7C-1         | Cyclic     | FWCMGDGRPRCTG     |
| 7C-2         | Cyclic     | WFCLEDGRPKCDR     |
| 7C-12        | Cyclic     | WNCVMRGDFWCPY     |
| 15-23        | Linear     | KPLRAKREITKLKFG   |

Supplementary Table 9-1 Peptides, which are used as coating materials on biomaterial surface, for stem cell culture and differentiation.<sup>98,173,174,178-181</sup>

| Cells                                                                                                                                                                         | Peptides                                                                                                 | Substrates                                                         | Immobilization                            | Purpose                                                                 | Ref. |
|-------------------------------------------------------------------------------------------------------------------------------------------------------------------------------|----------------------------------------------------------------------------------------------------------|--------------------------------------------------------------------|-------------------------------------------|-------------------------------------------------------------------------|------|
| <b>Collagen-derived peptide</b>                                                                                                                                               |                                                                                                          |                                                                    |                                           |                                                                         |      |
| hBMSCs                                                                                                                                                                        | DGEA, P15<br>(GTPGPQIAGQAGVV),<br>GFOGER                                                                 | Hydroxyapatite<br>disk                                             | Coating<br>(1mg/mL)                       | Cell attachment &<br>differentiation                                    | 173  |
| <b>Fibronectin-derived peptide</b>                                                                                                                                            |                                                                                                          |                                                                    |                                           |                                                                         |      |
| hBMSCs                                                                                                                                                                        | GRGDdSP (FN receptor)                                                                                    | Hydroxyapatite                                                     | Coating (1, 10, 100,<br>1000 µg/mL)       | Cell attachment and<br>spreading                                        | 174  |
| HeLa, HepG2, A498,<br>Du145, C6, C2C12<br>myoblasts and hMSCs                                                                                                                 | FNIN2<br>(LSISPSDNAVVLNLLPTGE),<br>FNIN3<br>(TVYAVTGRGDSPASSKPC)                                         | Polymerized<br>dopamine and<br>polymerized tannic<br>acid          | Coating (1 µM)                            | Adhesion, proliferation<br>and differentiation into<br>osteoblasts      | 180  |
| <b>Vitronectin-derived peptide</b>                                                                                                                                            |                                                                                                          |                                                                    |                                           |                                                                         |      |
| hBMSCs                                                                                                                                                                        | GPenGRGDSPCA (VN<br>receptor, Disulfide bond<br>between Pen <sup>2</sup> and Cys9),<br>Pen=penicillamine | Hydroxyapatite                                                     | Coating (1, 10, 100,<br>1000 µg/mL)       | Cell attachment and<br>spreading                                        | 174  |
| hBMSCs                                                                                                                                                                        | GPenGRGDSPCA,<br>EEEEEEGPenGRGDSPCA<br>(Pen=penicillamine)                                               | Hydroxyapatite                                                     | Coating                                   | Cell adhesion,<br>spreading                                             | 178  |
| hESCs                                                                                                                                                                         | Peptide-conjugated polyacrylate<br>(Synthemax)                                                           | TCPS                                                               | Coating                                   | Cell differentiation into<br>insulin-secreting cells                    | 179  |
| hPSC-derived human<br>neural progenitor cells                                                                                                                                 | Vitronectin derived peptide<br>(CGKKQRFRRHRNRKG,<br>CKGGPQVTRGDVFTMP)                                    | TCPS                                                               | Coating (100, 200,<br>500 µM)             | Cell adhesion,<br>proliferation<br>differentiation into<br>neural cells | 98   |
| <b>Human neural<br/>progenitor cells from<br/>non-demented<br/>patients, Familial<br/>Alzheimer's disease<br/>patients, and Sporadic<br/>Alzheimer's disease<br/>patients</b> | Vitronectin-derived peptide<br>(CGKKQRFRRHRNRKG)                                                         | TCPS                                                               | Coating (minimum<br>500uM (885<br>µg/mL)) | Differentiation into<br>astrocytes                                      | 181  |
| hPSC-derived<br>neural progenitor<br>cells                                                                                                                                    | Vitronectin-derived peptide<br>(CGKKQRFRRHRNRKG)                                                         | Microcarriers<br>(Corning Enhanced<br>attachment<br>microcarriers) | Coating (0.5 mM)                          | Differentiation into<br>astrocytes                                      | 181  |

Supplementary Table 9-2 Peptides, which are used as coating materials on biomaterial surface, for stem cell culture and differentiation. <sup>89,92,98,108,182-185</sup>

| Cells                                      | Peptides                                                                                                                                                                                                                                                                                                               | Substrates                                                                                                          | Immobilization                      | Purpose                                                        | Ref. |
|--------------------------------------------|------------------------------------------------------------------------------------------------------------------------------------------------------------------------------------------------------------------------------------------------------------------------------------------------------------------------|---------------------------------------------------------------------------------------------------------------------|-------------------------------------|----------------------------------------------------------------|------|
| <b>Laminin-derived peptide</b>             |                                                                                                                                                                                                                                                                                                                        |                                                                                                                     |                                     |                                                                |      |
| hPSC-derived human neural progenitor cells | Laminin a1 derived peptide (CGGTWYKIAFQRNRK, CIKLLI, CGGRKRLQVQLSIRT, CIKVAV, CGGNRWHSIYITRFG), laminin β1 (CRYVVLPR) derived peptide, laminin β2 derived peptide (CRNIAEIIKDI) laminin γ1 derived peptide (CDITYVRLKF, CGGKAFDITYVRLKF, CDIRVTLNRL, CTTVKYIFR), fibronectin derived peptide, collagen derived peptide | TCPS                                                                                                                | Coating (100, 200, 500 μM)          | Cell adhesion, proliferation differentiation into neural cells | 98   |
| Neuro2a (mouse neuroblastoma), rat NPSCs   | LN-111 peptides, (AG73, RKRLQVQLSIRT; C16, KAFDITYVRLKF; A99, AGTFALRGDNPQG; AG10, NRWHSIYITRFG; EF1XmR, RLQLQEGRLHFXFD with X=Nle)                                                                                                                                                                                    | TCPS                                                                                                                | Coating with peptide-BSA conjugates | Cell attachment, neuronal differentiation, neurite outgrowth   | 89   |
| mouse hiPSCs                               | ELP-RGD-ELP-p20, ELP-p20 (p20; RNIAEIIKDI, ELP; (APGVGV)12)                                                                                                                                                                                                                                                            | TCPS                                                                                                                | Coating (0-1000 nM)                 | Neural differentiation                                         | 108  |
| Human Wharton's Jelly-derived MSCs         | YIGSRWYQNMIRIKVAV, QHREDGSYIGSRIKAVAV, WQPPRARIYIGSRIKAVAV, DGEARGDSPKRSR                                                                                                                                                                                                                                              | Multilayer graphene oxide                                                                                           | Coating (50μM)                      | Proliferation, differentiation into osteoblasts                | 92   |
| <b>RGD-containing peptide</b>              |                                                                                                                                                                                                                                                                                                                        |                                                                                                                     |                                     |                                                                |      |
| hNSCs                                      | FAN-RGD-CSAP, TAMRA-RGD-CSAP, TAMRA-RGD-CSAP, dendri(PEO)6-CSAP, dendri(PEO)10-CSAP                                                                                                                                                                                                                                    | Single-walled carbon nanotube                                                                                       | Coating                             | Cell differentiation into neurons                              | 182  |
| hBMSCs                                     | RGDC-polyaminoamine dendrimer, Polyamidoamine dendrimer-CRGD                                                                                                                                                                                                                                                           | PS                                                                                                                  | Coating (770 μg/mL)                 | Cell adhesion, proliferation                                   | 183  |
| C2C12 cells (mouse myoblasts)              | RGD-DWIVA                                                                                                                                                                                                                                                                                                              | Glass plates                                                                                                        | Coating                             | Cell adhesion                                                  | 184  |
| hADSCs                                     | Cyclic RGD (cyclo(RGDfC))                                                                                                                                                                                                                                                                                              | Poly[Lys(Ser(0.9)-DL-Ala(2.7))], SAK coated on titanium alloy or Bio Oss bovine bone substitute (Geistlich Bio-Oss) | Coating                             | Cell adhesion, differentiation into osteoblasts                | 185  |

Supplementary Table 9-3 Peptides, which are used as coating materials on biomaterial surface, for stem cell culture and differentiation. <sup>129,150,177,186,187</sup>

| Cells                                          | Peptides                                                                                                                                                                                                                                                                                              | Substrates                                                           | Immobilization                      | Purpose                                                                                           | Ref. |
|------------------------------------------------|-------------------------------------------------------------------------------------------------------------------------------------------------------------------------------------------------------------------------------------------------------------------------------------------------------|----------------------------------------------------------------------|-------------------------------------|---------------------------------------------------------------------------------------------------|------|
| <b>Other types of peptides</b>                 |                                                                                                                                                                                                                                                                                                       |                                                                      |                                     |                                                                                                   |      |
| hBMSCs                                         | hBMP-2<br>(KIPKACCVPTELSAISMLYL),<br>hOCN (γEPRRγEVCyEL), eBMP-2<br>(KIPASSVPTELSAISTLYL), eBGa3<br>(KIPASSVPTELSAISTLYL-AAA-<br>γEPRRγEVCyEL), eBGa1<br>(KIPASSVPTELSAISTLYL-AAA-<br>γEPRRAVAAL), eBGu3<br>(KIPASSVPTELSAISTLYL-AAA-<br>EPRREVAEL), eBGu1<br>(KIPASSVPTELSAISTLYL-AAA-<br>EPRRAVAAL) | Hydroxyapatite grown<br>on PLG (Poly(lactide-<br>co-glycolide) films | Coating (100<br>μg/mL)              | Cell differentiation into<br>osteoblasts                                                          | 177  |
| Rat MSCs                                       | ALKRQGRTLTGPGG (Osteogenic<br>growth peptide)                                                                                                                                                                                                                                                         | Titanium implant                                                     | Coating                             | Cell attachment, cell<br>proliferation, cell<br>differentiation into<br>osteoblasts               | 186  |
| Rat BMSCs                                      | LL-37<br>(LLGDFFRKSKEKIGKEFKRIVQRIK<br>DFLRNLVPRTES)                                                                                                                                                                                                                                                  | Titanium implant                                                     | Coating (5,<br>50, 100<br>μg/ mL)   | Cell adhesion, cell<br>viability, cell migration,<br>and cell differentiation<br>into osteoblasts | 129  |
| hESCs (H9),<br>hiPSCs                          | Decellularized peptides from bovine<br>neural retina, retinal pigment<br>epithelium                                                                                                                                                                                                                   | Polystyrene dishes                                                   | Coating                             | Cell differentiation into<br>retinal organoids                                                    | 187  |
| iPSC-derived<br>neuroepithelial<br>progenitors | p51 peptide, pV1, pM2, pIIB3<br>peptides                                                                                                                                                                                                                                                              | Vinylsulfone<br>functionalized<br>polyvinylalcohol<br>hydrogels      | Coating (30<br>μg/cm <sup>2</sup> ) | Cell adhesion,<br>proliferation &<br>differentiation                                              | 150  |

Supplementary Table 10-1 Peptides, which are grafted on biomaterial surface, for stem cell culture and differentiation.<sup>57,60,91,93,94,159,204-211</sup>

| Cell                                                     | Peptide                                                                                                                                                                                 | Substrates                                             | Reaction method                           | Purpose                                                     | Ref. |
|----------------------------------------------------------|-----------------------------------------------------------------------------------------------------------------------------------------------------------------------------------------|--------------------------------------------------------|-------------------------------------------|-------------------------------------------------------------|------|
| <b>Gold-sulfur reaction</b>                              |                                                                                                                                                                                         |                                                        |                                           |                                                             |      |
| hESCs (H1, H9)                                           | DITYVRLFKF, DIRVTNLRL, TTVKYIFR, RNIAEIIKDI, RYVVLPR                                                                                                                                    | SAM of alkanethiolates on Gold surface                 | Gold-sulfidyl reaction                    | Proliferation (cell attachment)                             | 91   |
| hBMSCs                                                   | GGGGWGGGRGDSP, BMP receptor binding peptides (BR-BP; <b>GGGKIPKASSVPTELSAISTLYL</b> ), Heparin proteoglycan-binding peptide (HPG-BP; <b>GGGKRTGQYKL</b> )                               | SAM of alkanethiolates on Gold surface                 | Gold-sulfur reaction                      | Proliferation (cell attachment), Osteogenic differentiation | 204  |
| Human neural stem/progenitor cells                       | CSRARKQAASIKVAVSADR, CCRRIKVAWLC                                                                                                                                                        | Gold surface                                           | Gold-sulfur reaction                      | Cell attachment, proliferation, migration. Differentiation  | 57   |
| hADSCs                                                   | Cystein modified quadruple-branched RGD                                                                                                                                                 | Nanopatterned graphene oxide                           | Gold-sulfur reaction                      | Differentiation into osteoblasts                            | 205  |
| Mouse BMSCs (MSCD1)                                      | CALNNAGRKKRRQRRR (cell penetrating peptide)                                                                                                                                             | Gold nanorods conjugated thiolated PEG5000             | Gold-sulfur reaction                      | Cell labelling                                              | 206  |
| hESCs (WA01)                                             | 11-mercaptoundecanoic acid (MUA)-GGNGEPRGDTYRAYK, 11-MUA-bspRGD(15) (CGGNGEPRGDTTRAT), 11-MUA-GKPLRAKREITKLKFG, 11-MUA-GGRKLRQVQLSIRT, 11-MUA-Ag73 (RKRLQVQLSIRT), FWCMDGGRPRCTG (7C-1) | Au/Pd sputter-coated surface                           | Gold-sulfur reaction                      | Cell attachment and proliferation                           | 60   |
| <b>Carbodiimide &amp; succinimide reaction</b>           |                                                                                                                                                                                         |                                                        |                                           |                                                             |      |
| Rat Neural stem cells                                    | GGNGEPRGDTYRAY, GRGDSP                                                                                                                                                                  | Self-assembled Phospholipid bilayer                    | Dicyclohexylcarbodiimide reaction         | Cell adhesion, proliferation, differentiation               | 207  |
| Mouse Neural stem cells (NE-4C)                          | IKVAV                                                                                                                                                                                   | PNIPAM-b-poly(acrylchloride)-PEG-IKVAV                 | <b>DCC/NHS</b> reaction                   | Cell survival and Differentiation                           | 208  |
| Rat cortical astrocytes, rat skin fibroblasts (CRL-1213) | IKVAV, RGDS, YIGSR, KHIFSDDSE (NCAM).                                                                                                                                                   | Glass coverslips                                       | Carbodiimide chemistry (EDC reaction)     | Cell attachment                                             | 209  |
| hADSCs                                                   | G4RGDSP                                                                                                                                                                                 | Oxidized alginate hydrogels                            | Carbodiimide chemistry (EDC reaction)     | Proliferation (cell attachment)                             | 210  |
| hADSCs                                                   | RGD, YIGSR, CRARKQAASIKVAVSADR (IKVAV)                                                                                                                                                  | Polycaprolactone disk                                  | Aminolysis, EDC/NHS reaction              | Cell attachment, proliferation                              | 93   |
| hESCs (H1, H7)                                           | Ac-KGGPQVTRGDVFTMP (VN), KYGAASIKVAVSADR (LM), Ac-KGGNGEPRGDTYRAY (BSP), NGEPRGDTYRAY (BSP), GRGDSPK (sFN), Ac-KGGAVTGRGDSPASS (IFN)                                                    | Polyacrylate film                                      | Carbodiimide chemistry (EDC/NHS reaction) | Cell proliferation, differentiation                         | 94   |
| hiPSCs (UMC-C1)                                          | KGGPQVTRGDVFTMP (VN peptide) (Chinapeptides Co. Shanghai)                                                                                                                               | poly(OEGMA-co-HEMA) film (SAM)                         | Succinic reaction & EDC/NHS reaction      | Cell proliferation                                          | 211  |
| hiPSCs                                                   | KGGPQVTRGDVFTMP                                                                                                                                                                         | Polyvinylalcohol/hyaluronan electrospinning nanofibers | Carbodiimide chemistry (EDC/NHS reaction) | Cell attachment                                             | 159  |

Supplementary Table 10-2 Peptides, which are grafted on biomaterial surface, for stem cell culture and differentiation.<sup>95,115, 131,132,160-162,164,212-215</sup>



| Cell                                       | Peptide                                                                                                                                           | Substrates                                                                                                                      | Reaction method                                                          | Purpose                                                                           | Ref. |
|--------------------------------------------|---------------------------------------------------------------------------------------------------------------------------------------------------|---------------------------------------------------------------------------------------------------------------------------------|--------------------------------------------------------------------------|-----------------------------------------------------------------------------------|------|
| hESCs (H9), hiPSCs (HPS0077)               | KGGPQVTRGDVFTMP                                                                                                                                   | Poly(vinylalcohol-co-itaconic acid) hydrogels                                                                                   | Carbodiimide chemistry (EDC/NHS reaction)                                | Proliferation                                                                     | 164  |
| Rat BMSCs                                  | KRSR, FHRRKA (heparin binding domain, bone mineralization)                                                                                        | Plasma treated-Polyhedral oligomeric silsesquioxane (POSS) nanoparticle crosslinked with polycarbonate-based urea-urethane film | Carbodiimide chemistry (EDC/NHS reaction)                                | Cell attachment and differentiation (osteoblast)                                  | 272  |
| hiPSCs (UMC1-C1), hESCs (H9)               | KGGPQVTRGDVFTMP (VN peptide), KGGQFSYPYKAVFSTQ (BFP-1 peptide)                                                                                    | Carboxymethyl chitosan-grafted polydopamine surface (polydopamine-coated dishes)                                                | Carbodiimide chemistry (EDC/NHS)                                         | Cell attachment, proliferation, differentiation into osteoblasts                  | 160  |
| Rat BMSCs                                  | KIPKASSVPTLSAISTLYL (BMP peptide)                                                                                                                 | Mesoporous silica nanoparticles                                                                                                 | Activation by 3-aminopropyltriethoxysilane and EDC/NHS reaction          | Cell viability, differentiation into osteoblasts                                  | 212  |
| hMSCs                                      | RGD                                                                                                                                               | Gold nanoparticles                                                                                                              | Poly(amidoamine) coating and maleimide-amine reaction, EDC/NHS reaction  | Gene delivery                                                                     | 213  |
| Murine multipotent cells (C3H10T1/2, MSCs) | pBSP (CGNGEPRGDTYRAY), pFibro (CGGPHSRNGGGGGRGDG), pBMP-9 (CGGKVGKACCVPTKLSPISVLYK)                                                               | Polycaprolactone films                                                                                                          | Carbodiimide chemistry (EDC/NHS reaction), S-S binding exchange reaction | Cell adhesion                                                                     | 131  |
| hESCs (H9), hiPSCs (HPS0077)               | VN1 (KGGPQVTRGDVFTMP), VN1G (GGGGKGGPQVTRGDVFTMP), VN2C (GCGGKGGPQVTRGDVFTMP), BSP (KGGNGEPRGDTYRAY), HBP1 (GKKQFRHRNRKG), HVP2C (GCGGKQFRHRNRKG) | Poly(vinylalcohol-co-itaconic acid) hydrogels                                                                                   | Carbodiimide chemistry (EDC/NHS reaction)                                | Cell proliferation, pluripotency, differentiation                                 | 161  |
| Human neural stem cells                    | CSRARKQAASIKVAVSADR                                                                                                                               | Silk fibroin hydrogels                                                                                                          | EDC/NHS reaction                                                         | Cell viability, proliferation, differentiation into neuron                        | 95   |
| hiPSCs (hNF-C1), hESCs (H9)                | VN peptide (KGGPQVTRGDVFTMP)                                                                                                                      | Carboxymethyl chitosan-coated polycaprolactone nanofibers                                                                       | Carbodiimide chemistry (EDC/NHS)                                         | Cell proliferation, pluripotency, differentiation into osteoblasts                | 162  |
| hMSCs                                      | BFP-1 (GQGFSYYPYKAVFSTQ) from BMP-7                                                                                                               | Carboxymethylchitosan-grafted polydopamine-coated surface                                                                       | Carbodiimide chemistry (EDC/NHS reaction)                                | Cell viability, antiinflammatory activity assay, differentiation into osteoblasts | 132  |
| hBMSCs (Lonza)                             | EEEEEEEDGWA (collagen I peptide), 25 uM of 100uL                                                                                                  | Poly(butylene succinate)/β-tricalcium phosphate scaffold                                                                        | Carbodiimide chemistry (EDC/NHS reaction)                                | Osteogenic differentiation                                                        | 214  |
| hBMSCs                                     | GRKKRRQRRRGGGRGD (R peptide)                                                                                                                      | Electrospinning polycaprolactone nanofibrous scaffolds                                                                          | Plasma treatment, Carbodiimide chemistry (EDC/NHS reaction)              | Cell spreading, cell proliferation                                                | 115  |
| hBMSCs                                     | EEEEEE (Glu), DDDDDD (ASP), EEEEEEK, DDDDDDK                                                                                                      | PLGA electrospinning nanofibers                                                                                                 | Plasma treatment, Carbodiimide chemistry (EDC/NHS reaction)              | Cell adhesion, differentiation into osteoblasts                                   | 215  |

Supplementary Table 10-3 Peptides, which are grafted on biomaterial surface, for stem cell culture and differentiation.<sup>68,105,109,163,168,216-222</sup> [1-12]

| Cell                                           | Peptide                                                                                                                                                                              | Substrates                                     | Reaction method                           | Purpose                                                                          | Ref. |
|------------------------------------------------|--------------------------------------------------------------------------------------------------------------------------------------------------------------------------------------|------------------------------------------------|-------------------------------------------|----------------------------------------------------------------------------------|------|
| hiPSCs (hNF-C1)                                | VN (KGGPQVTRGDVFTMP), Bone forming Protein peptide (KGGQGFSYPYKAVFSTQ)                                                                                                               | Carboxymethyl chitosan-immobilized dishes      | Carbodiimide chemistry (EDC/NHS)          | Cell adhesion, proliferation, colony formation, differentiation into osteoblasts | 163  |
| hiPSCs (hNF-C1)                                | KGGPQVTRGDVFTMP, KGGQGFSYPYKAVFSTQ (BFP)                                                                                                                                             | Carboxymethyl chitosan hydrogels               | Carbodiimide chemistry (EDC/NHS)          | Cell proliferation and differentiation (osteoblast)                              | 163  |
| hADSCs                                         | EGGYIGSR                                                                                                                                                                             | Chitosan coated dishes                         | Carbodiimide chemistry (EDC/NHS)          | Cell attachment, pluripotent stem cell marker expression                         | 109  |
| hESCs (H1), hiPSCs (HPS0076), hiPSCs (hUSiPS1) | rMAP-ASKAIQFLLGG, rMAP-QQNLGSVNVSTG, rMAP-PHSRN, rMAP-RGD, rMAP-GRGDSP, rMAP-PHSRN-GRGDSP, rMAP-SPPRRARVT, rMAP-WQPPRARI, rMAP-KNNQKSEPLIGRKKT, rMAP-NRWHSIYITRFG, rMAP-TWYKIAFQRNRK | Cell culture plate                             | Carbodiimide chemistry (EDC/NHS)          | Cell attachment and proliferation                                                | 105  |
| hPSCs (H1)                                     | E-cadherin mimicking peptides; HAV10 (LFSHAVSSNG), HAV6 (SHAVSS), ADT10 (QGADTPPVGV), ADT6 (ADTPPV)                                                                                  | Alginate hydrogels                             | Carbodiimide chemistry (EDC/NHS)          | Proliferation                                                                    | 216  |
| hESCs (H1), hiPSCs (HPS0077)                   | GGGGPASYRGDSC, GGGGKGGPASYRGDSC PMQKMRGDVFSP, GGGGPMQKMRGDVFSP, GGGGKGGPQKMRGDVFSP, GCGGKGGPQKMRGDVFSP, GGGGKGGPQVTRGDVFTMP, GCGGKGGPQVTRGDVFTMP                                     | Polyvinyl(alc ohol-co-itaconic acid) hydrogels | Carbodiimide chemistry (EDC/NHS)          | Proliferation, Differentiation into cardiomyocytes                               | 68   |
| hPSCs (H9), hiPSCs (NL1)                       | VN1 (KGGPQVTRGDYCTFP)- and VN2 (KGGPGVTRGDYFTFP)-conjugated nussel adhesive protein                                                                                                  | TCPS dishes or nanofiber                       | Carbodiimide chemistry (EDC/NHS reaction) | Differentiation into Oligodendrocytes                                            | 168  |
| Rat BMSCs                                      | Graphene paper binding peptide (TWWNPRLVYFDY)                                                                                                                                        | Hydroxyapatite rod, graphene paper             | Carbodiimide chemistry (EDC/NHS)          | Attachment, proliferation, osteogenic differentiation                            | 217  |
| Rat BMSCs                                      | G4RGDSP                                                                                                                                                                              | Alginate hydrogels                             | Carbodiimide chemistry (EDC/Sulfo-NHS)    | Bone formation                                                                   | 218  |
| hBMSCs                                         | Cyclic RGD (G4CRGDSPC), G4RGDSP (linear)                                                                                                                                             | Alginate hydrogels                             | Carbodiimide chemistry (EDC/sulfo-NHS)    | Cell differentiation into osteoblasts                                            | 219  |
| hBMSCs                                         | GGGGRGDY                                                                                                                                                                             | Alginate scaffold                              | Carbodiimide chemistry (EDC/sulfo-NHS)    | Cell adhesion, differentiation into chondrocytes                                 | 220  |
| Murine osteoblast (7F2), Murine MSCs (D1s)     | G4DWIVA, G4RGDSP CGKIPKASSVPTLSAISTLYL (Lysine-containing BMP-2 knuckle epitope peptide)                                                                                             | Alginate hydrogels                             | Carbodiimide chemistry (EDC/sulfo-NH)     | Cell differentiation into osteoblasts                                            | 221  |
| Nurine MSCs (D1), Rat BMSCs                    | GGGGDGEASP (collagen I mimetic peptide DGEA), GGGGRGDSP                                                                                                                              | Alginate hydrogels                             | Carbodiimide chemistry (EDC/Sulfo-NHS)    | Cell adhesion, differentiation into osteoblasts                                  | 222  |

Supplementary Table 10-4 Peptides, which are grafted on biomaterial surface, for stem cell culture and differentiation.<sup>57,117,124,133,223-229</sup>

| Cell                                                 | Peptide                                                                               | Substrates                                                             | Reaction method                                                                                                         | Purpose                                                                          | Ref. |
|------------------------------------------------------|---------------------------------------------------------------------------------------|------------------------------------------------------------------------|-------------------------------------------------------------------------------------------------------------------------|----------------------------------------------------------------------------------|------|
| hMSCs                                                | RGD peptide (GGGGRGDASSP), Bone forming peptide-1 (BFP-1, GQGFSYPYKAVFSTQ from BMP-7) | Mesoporous silica nanoparticles (pep@MSNs) - loaded Alginate hydrogels | Carbodiimide chemistry (EDC/Sulfo-NHS)                                                                                  | Cell differentiation into osteoblasts                                            | 223  |
| hBMSCs                                               | BFP-1 (GQGFSYPYKAVFSTQ) from BMP-7                                                    | Alginate scaffolds                                                     | Carbodiimide chemistry (EDC/Sulfo-NHS)                                                                                  | Cell adhesion, proliferation, differentiation into osteoblasts                   | 133  |
| hESC (H9)-derived cardiomyocytes, dermal fibroblasts | G4RGDY, G4SPRRRARVTY (Heparin binding peptide)                                        | Alginate scaffolds                                                     | Carbodiimide chemistry (EDC/Sulfo-NHS)                                                                                  | Cell adhesion, cell function maintenance                                         | 124  |
| Rabbit BMSCs                                         | (GPO)8-CG-RGDS                                                                        | Hyaluronic acid hydrogels                                              | Carbodiimide chemistry (EDC/sulfo-NHS)                                                                                  | Cartilage differentiation                                                        | 224  |
| Neural stem cells                                    | RGDSP, cyclic(RGDfK)                                                                  | PEG-NHS diacrylate hydrogels                                           | NHS chemistry (PEG-NHS & peptide), photo-initiated polymerization                                                       | Cell differentiation into neuron, astrocytes                                     | 225  |
| <b>Thiol-ene reaction</b>                            |                                                                                       |                                                                        |                                                                                                                         |                                                                                  |      |
| hBMSCs                                               | CRGDSD, CRGDSCG, CGGGGGGGGRGDSD                                                       | PEG (PEGDA) hydrogels                                                  | Photo-initiated thiol-acrylate reaction                                                                                 | Cell survival                                                                    | 226  |
| hMSCs                                                | GCGYGRGDSPG                                                                           | Acrylated PEG hydrogels functionalized with acryloyl chloride          | Michael type addition (Thiol-ene Click reaction) using acrylated PEG                                                    | Cell viability, differentiation into chondrocytes                                | 227  |
| hBMSCs                                               | CGRGDS                                                                                | Self assembled polystyrene-block-polyethylene oxide                    | Michael-type addition (Maleimide-thiol reaction)                                                                        | Cell adhesion, Cell spreading, differentiation into osteoblasts                  | 228  |
| Rat neural stem/progenitor cells                     | rat PDGF-A, GLNDIFEAQKIEWHE, EFPKPSTPPGSSGGAP                                         | Hyaluronan-methyl cellulose                                            | Michael-type addition (Maleimide-thiol reaction), biotin ligase enzyme, Avidin-biotin reaction, maleimide-streptavidine | Injectable hydrogels, cell viability, cell differentiation into oligodendrocytes | 229  |
| Human neural stem/progenitor cells                   | CSRARKQAASIKVAVSADR, CCRRIKVAVWLC                                                     | PEG hydrogels                                                          | Michael-type addition reaction (thiol-ene reaction)                                                                     | Cell attachment, proliferation, migration. Differentiation                       | 57   |
| Rat BMSCs                                            | Cyclic RGD (GRGDfE-C12-C12-C), BFP-1 (CGQGFSYPYKAVFSTQ)                               | Quartz plate                                                           | Aminosilane reaction, Michael-type addition (Maleimide-thiol reaction)                                                  | Cell adhesion, differentiation into osteoblasts                                  | 117  |

Supplementary Table 10-5 Peptides, which are grafted on biomaterial surface, for stem cell culture and differentiation. <sup>90,126,128,130,138,203,230-236</sup>

| Cell                                           | Peptide                                                                                                                                                                         | Substrates                                                              | Reaction method                                                               | Purpose                                                             | Ref. |
|------------------------------------------------|---------------------------------------------------------------------------------------------------------------------------------------------------------------------------------|-------------------------------------------------------------------------|-------------------------------------------------------------------------------|---------------------------------------------------------------------|------|
| Rabbit BMSCs                                   | Cytomodulin-10 (LIANAK, LIANAKC for Crick reaction), cytomodulins (growth factor-b1 mimicking peptide cytomodulin), P24 (KIPKA SSVPT ELSAI STLYL SGGC, BMP-2 mimicking peptide) | Injectable PLLA-g-PHEMA-acrylic nanofibrous hollow microspheres         | Michael type addition (Thiol-ene Click reaction)                              | Cell differentiation into chondrocytes, osteoblasts                 | 230  |
| hMSCs                                          | EEGGC                                                                                                                                                                           | PLA (electrospun nanofibers)                                            | Acryloyl chloride reaction, Michael addition (thiol-ene reaction)             | Cell differentiation into osteoblasts                               | 130  |
| rat MSCs                                       | KKRGDfKKEGCc(cRGD-K), DDRGDfDDEGCc(cRGD-D), GGRGDfGGEGCc(cRGD-G), PFSSTKTEGC(cBMHP1)                                                                                            | Quartz plate                                                            | Aminosilane reaction, Michael-type addition (Maleimide-thiol reaction)        | Cell adhesion, differentiation into osteoblasts                     | 231  |
| hBMSCs                                         | CG-K(PEG3-TAMRA (5-carboxytetramethylrhodamine))-GGRGDS (Ref 22), CKIPKASSVPTELSAISMLYL (BMP-2 peptide, 73-92)                                                                  | Aminated glass                                                          | Aminosilane reaction, Michael-type addition (Maleimide-thiol reaction)        | Cell differentiation into osteoblasts                               | 138  |
| hBMSCs (SCR108)                                | [RGDS-Ahx-Ahx (Ahx: 2-Aminohexanoic acid)]-(PHSRN-Ahx-Ahx)-K-βA-C (Branched peptide), MPA-Ahx-Ahx-RGDS, MPA-Ahx-Ahx-Ahx-PHSRN, (MPA: 3-mercaptoproionic acid)                   | Ti surface                                                              | Aminosilane reaction, Michael-type addition (Maleimide-thiol reaction)        | Cell adhesion (attachment), cell differentiation into osteoblasts   | 232  |
| Murine ESCs                                    | <b>HAVDIGGGC</b> (HAVDI, n-cadherin peptide)                                                                                                                                    | PEG dimethacrylate hydrogels                                            | Michael addition (thiol-ene reaction) (Alkene-sulfhydryl reaction)            | Cell survival, cell differentiation into neural cells               | 126  |
| hiPSC (ND2.0)-derived neural stem cells        | <b>HAVDIGGGC</b> (N-cadherin peptide)                                                                                                                                           | PEG dimethacrylate hydrogels                                            | Michael-type addition (thiol-ene reaction)                                    | Cell survival, differentiation                                      | 128  |
| Dental pulp pluripotent-like stem cells        | CRRR, CKKK, CHHH, CDDD                                                                                                                                                          | Acrylate-terminated Poly(β-amino ester)                                 | Michael addition (Alkene-thiol reaction)                                      | Gene delivery, cell differentiation into osteoblasts                | 233  |
| hiPSCs                                         | <b>CGGPQVTRGDVFTMPK</b> (VN peptide)                                                                                                                                            | Chitosan films                                                          | NHS-PEG-Maleimide reaction (Michael-type addition (Maleimide-thiol reaction)) | Cell proliferation, pluripotency                                    | 234  |
| hBMSCs                                         | CG-K(PEG3-TAMRA (5-carboxytetramethylrhodamine))-GGRGDS, CKIPKASSVPTELSAISMLYL (BMP-2 peptide, 73-92)                                                                           | Borosilicate Glass slides                                               | Michael-type addition (Maleimide-thiol reaction) using APTES and SMPB         | Cell adhesion, differentiation into osteoblasts                     | 235  |
| hESC (H9)-derived Neural stem/progenitor cells | RGD (GCGYGRGDSPG), IKVAV (GCGYGIKVAVADR), YIGSR (GCGYGYIGSR)                                                                                                                    | Hyaluronic acid Hydrogels                                               | Michael-type addition (Maleimide-thiol reaction)                              | Cell proliferation, differentiation into oligodendrocytes & neurons | 90   |
| BMSCs                                          | BMP-2 peptide ( <b>SKIPKASSVPTELSAISTLYL</b> DDDD)                                                                                                                              | Polydopa-coated Nano hydroxyapatite/PLLA/gelatin nanofibers             | Michael addition & Schiff base reaction)                                      | Cell differentiation into osteoblasts                               | 203  |
| hPSCs (H9)                                     | cyclo(RGDfK)                                                                                                                                                                    | Porous thiol-acrylate high internal phase emulsion materials (polyHIPE) | Michael-type addition (Maleimide-thiol reaction)                              | Cell attachment                                                     | 236  |

Supplementary Table 10-6 Peptides, which are grafted on biomaterial surface, for stem cell culture and

| Cell                                                        | Peptide                                                                                                                                                                                                                                                                                      | Substrates                                                                       | Reaction method                                                                                   | Purpose                                                          | Ref. |
|-------------------------------------------------------------|----------------------------------------------------------------------------------------------------------------------------------------------------------------------------------------------------------------------------------------------------------------------------------------------|----------------------------------------------------------------------------------|---------------------------------------------------------------------------------------------------|------------------------------------------------------------------|------|
| Human ADSCs                                                 | CSRARKQAASIKVA/VSADR                                                                                                                                                                                                                                                                         | N-methacrylate glycol<br>Chitosan hydrogels                                      | Michael type<br>addition<br>(Methacrylate-<br>thiol reaction)                                     | ADSC<br>delivery and<br>angiogenesis                             | 237  |
| hiPSCs, hiPSC-<br>derived<br>neuroepithelial<br>progenitors | p51 (CDTFPYLGGWWNPNEYRY), pV1,<br>pM2, pIb3 peptides                                                                                                                                                                                                                                         | Vinylsulfone<br>functionalized<br>polyvinylalcohol<br>hydrogels                  | Vinylsulfone-<br>thiol reaction                                                                   | Cell adhesion,<br>proliferation,<br>differentiation              | 150  |
| Rat BMSCs                                                   | WEAKLAKALAKALAKHLAKALAKALKAC<br>EA (KALA peptide)                                                                                                                                                                                                                                            | Mesoporous silicon<br>nanoparticles (MSN)                                        | SPDP reaction<br>(thiol-ene<br>reaction)                                                          | Cell viability,<br>osteogenic<br>differentiation                 | 238  |
| hDPSCs                                                      | SH-KIPKASSVPTLSAISTLYL (BMP-2-<br>mimetic peptide), C terminal end (N-<br>terminal end?)                                                                                                                                                                                                     | Gelatin methacrylate-<br>Bioprinted constructs                                   | Michael<br>addition (thiol-<br>ene reaction)                                                      | Differentiation<br>into<br>osteoblasts<br>(dental<br>constructs) | 239  |
| Rat BMSCs                                                   | Vasoactive intestinal peptide<br>(CFTDNYRLRKQMAVKKYNSILN), RGD<br>(GCGYGRGDSPG)                                                                                                                                                                                                              | Methacrylated<br>Hyaluronic acid<br>hydrogels crosslinked<br>with dithiothreitol | Michael<br>addition (thiol-<br>ene reaction)                                                      | Differentiation<br>into<br>osteoblasts                           | 240  |
| Rabbit BMSCs                                                | (GPO)8-CGRGDS [Collagen mimetic<br>peptide], GCRDGPQIWGQDRCG [MMP<br>sensitive peptide]                                                                                                                                                                                                      | Hyaluronic acid<br>hydrogels                                                     | EDC/sulfo-NHS,<br>Michael type<br>addition<br>(Methacrylate-<br>thiol reaction)                   | MSC<br>differentiation<br>into cartilage                         | 224  |
| Rat neural<br>stem/progenitor<br>cells                      | Laminin-111 peptide (AG73(CGG-<br>RKRLQVQLSIRT), C16 (CGG-<br>KAFDITYVRLKF), A99 (CGG-<br>AGTFALRGDNPQG), AG10 (CGG-<br>NRWHSIYTRFG), EF1XmR (CGG-<br>RLQLQEGRLHFXFD), x=Nle)                                                                                                                | Maleimido-functional<br>BSA                                                      | Michael-type<br>addition<br>(Maleimide-<br>thiol reaction)                                        | NPSC<br>adhesion and<br>differentiation                          | 89   |
| Rat neural<br>stem/progenitor<br>cells                      | CGGRKRLQVQLSIRT (AG73, mouse LN<br>$\alpha$ 1 chain), CGGKAFDITYVRLKF (C16,<br>mouse LN $\gamma$ 1 chain),<br>CGGAGTFALRGDNPQG (A99, mouse LN<br>$\alpha$ 1 chain), CGGNRWHSIYTRFG (AG10,<br>mouse LN $\alpha$ 1 chain),<br>CGGRLQLQEGRLHFXFD (X=Nle)<br>(EF1XmR, mouse LN $\alpha$ 1 chain) | Maleimide-BSA<br>coated TCPS surface                                             | Michael type<br>addition<br>(Maleimide-<br>thiol reaction)                                        | Differentiation<br>into neuron<br>and<br>astrocytes              | 89   |
| HUVECs, Murine<br>Neural precursor<br>cells                 | WGGRGDSP, AGTFALRGDNPQG,<br>ALRGDN, cRGD, ALRGDNGGKIKVAV,<br>ALRGDNGGYIGSR,<br>ALRGDNGGVGVAPG,<br>ALRGDNGGEIKLLIS, ALRGDNLRLSR,<br>KQNCLSSRASFRGCVRNLRLSR,<br>FRLVFRYG                                                                                                                       | Amino-PEG-<br>Cellulose paper,<br>cellulose                                      | DIC/HOBt<br>reaction, Michael<br>type addition<br>(thiol-Maleimide<br>reaction), SMCC<br>reaction | Cell<br>attachment                                               | 241  |
| Azide reaction                                              |                                                                                                                                                                                                                                                                                              |                                                                                  |                                                                                                   |                                                                  |      |
| hMSCs                                                       | RGDSP, TYRSRKY (a heparin/heparan<br>sulfate-binding peptide)                                                                                                                                                                                                                                | Gold surface                                                                     | EDC/NHS<br>reaction,<br>CuAAC<br>reaction                                                         | Cell<br>adhesion,<br>spreading                                   | 242  |
| mESCs (D3)                                                  | GYIGSR                                                                                                                                                                                                                                                                                       | Aligned and random<br>polylactide nanofibers                                     | Azide-peptide<br>& DIBO<br>reaction                                                               | Cell<br>differentiation<br>into neurons                          | 243  |
| hESCs (Mel-1<br>mCherry)                                    | GRGDG                                                                                                                                                                                                                                                                                        | Alkyne-PNIPAM-b-<br>PSt nanoworm<br>hydrogels                                    | CuAAC Click<br>reaction                                                                           | Proliferation                                                    | 244  |

Supplementary Table 10-7 Peptides, which are grafted on biomaterial surface, for stem cell culture and differentiation.<sup>99,100,198,245-249</sup>

| Cell                                                                                               | Peptide                                                      | Substrates                                     | Reaction method                                                                                                               | Purpose                                                                  | Ref. |
|----------------------------------------------------------------------------------------------------|--------------------------------------------------------------|------------------------------------------------|-------------------------------------------------------------------------------------------------------------------------------|--------------------------------------------------------------------------|------|
| mESCs (D3)                                                                                         | LREGGGC, GIKVAV (Laminin peptide)                            | Hyaluronic acid hydrogels                      | Michael addition (Alkene-sulfidyl reaction), EDC/NHS reaction, DBCO-Azide click reaction                                      | Cell proliferation, pluripotency, differentiation into neural cells      | 99   |
| Rabbit BMSCs                                                                                       | cyclo(RGDfK), HAVDIGGGK (N-cadherin mimetic peptide)         | Poly(L-glutamic acid) hydrogels                | Carbodiimide chemistry (EDC/NHS reaction), azide-alkyne cycloaddition (SPAAC) reaction                                        | Cell adhesion, differentiation into chondrocytes                         | 245  |
| Mouse BMSCs (D1)                                                                                   | HAVDIGGGK (N-cadherin-mimetic peptide)                       | Polyacrylamide hydrogels                       | sulfo-SANPAH reaction                                                                                                         | Cell attachment, differentiation into myocytes, secretion of VRGF, IGF-1 | 246  |
| Mouse MSCs (D1)                                                                                    | Ac-HAVDIGGGK-OH, N-cadherin EC1-5, N-cadherin EC1-2          | Polyacrylamide hydrogels                       | sulfo-SANPAH reaction                                                                                                         | Paracrine secretion of MSCs, Myogenic differentiation                    | 246  |
| Peripheral blood cells, mouse MSCs, human umbilical arterial smooth muscle cells (HUASMCs), HUVECs | Endothelial progenitor cell-targeting peptide (TPSLEQRTVYAL) | TiO <sub>2</sub> -coated 316L SS substrates    | Click reaction using azide (Azide-alkene reaction), N <sub>3</sub> -PEG5-COOH, DBCO-maleimide                                 | Cell adhesion and proliferation                                          | 198  |
| hiPSC-derived neural stem cells                                                                    | LREGGGC, IKVAV, KCGPQGIWGQCK                                 | Hyaluronic acid hydrogels                      | Michael-type addition (Maleimide-thiol reaction), azide-DBCO reaction                                                         | ECM remodeling, Neurite extension                                        | 100  |
| hADSCs                                                                                             | Protamine peptide (CVSRRRRRRGGRRRR)                          | Poly-(amidoamine) (G5) dendrimer               | SPDP reaction (thiol-ene reaction)                                                                                            | Gene delivery (GFP, IL-12 plasmid)                                       | 247  |
| rat BMSCs                                                                                          | GGGRGDSGGGY                                                  | Poly(N-(2-hydroxyethyl)-L-glutamine) hydrogels | CuAAC reaction between azidoacetic peptide and propargylated unit of Poly(N-(2-hydroxyethyl)-tyramine (azide-alkyne reaction) | Proliferation                                                            | 248  |
| <b>Acrylated or methacrylated peptide reaction</b>                                                 |                                                              |                                                |                                                                                                                               |                                                                          |      |
| BMSCs                                                                                              | (Proline-Hydroxyproline-Glycine) <sup>7</sup> -tyrosine      | PEG hydrogels                                  | Copolymerization using acryloyl-PEG-peptide with PEGDA                                                                        | Cell viability, cell differentiation into chondrocytes                   | 249  |
| hBMSCs                                                                                             | GRGDS, GCRDGPQGIWGQDRCG (MMP-sensitive peptide)              | PEG hydrogels                                  | Acrylated reaction using acryloyl chloride and polymerization                                                                 | Cell viability, cell differentiation into osteoblasts and chondrocytes   | 250  |

Supplementary Table 10-8 Peptides, which are grafted on biomaterial surface, for stem cell culture and differentiation.<sup>87,88,104,120,201,237,251-256</sup>

| Cell                                  | Peptide                                                                                                                                                                                                                                                               | Substrates                                                           | Reaction method                                                        | Purpose                                                                            | Ref. |
|---------------------------------------|-----------------------------------------------------------------------------------------------------------------------------------------------------------------------------------------------------------------------------------------------------------------------|----------------------------------------------------------------------|------------------------------------------------------------------------|------------------------------------------------------------------------------------|------|
| hADSCs, hiPSC-derived CM              | RGDSP, PMQKMRGDVFSP ( $\beta$ 4), SETQRGDVFVP ( $\alpha$ 5-1), PQVTRGDVFTMP (Vn), VTGRGDSPAS (Fn), PASYRGDSC ( $\alpha$ 5-2), DAVKQLQAAERGDA, TRGDVFT (VN-2), DVEKRGDREEAHVP ( $\alpha$ 1), IQRGDIDAMIS ( $\alpha$ 3), RSDGTG ( $\gamma$ 2), EAPRGDVYQG ( $\gamma$ 3) | PEG hydrogels                                                        | Random copolymerization of PEGDA and methacrylated peptide             | Cell adhesion                                                                      | 88   |
| Human ADSCs                           | GGGGRGDS                                                                                                                                                                                                                                                              | N-methacrylate glycol Chitosan hydrogels                             | N-acryloxysuccinimide reaction to peptides & copolymerization          | ADSC delivery and angiogenesis                                                     | 237  |
| HUVECs                                | RGDS, AGQWHRVSVRWG, SIKVAV, YIGSR, SIYITRF, IAFQRN, TWSQKALHHRVP (+ RGD)                                                                                                                                                                                              | PEG hydrogels                                                        | Copolymerization of Methacrylated peptide and PEGDA                    | Cell attachment                                                                    | 87   |
| <b>Diels-alder reaction</b>           |                                                                                                                                                                                                                                                                       |                                                                      |                                                                        |                                                                                    |      |
| Rat Neural stem/progenitor cells      | GRGDS (fibronectin-derived peptide)                                                                                                                                                                                                                                   | Gellan gum hydrogels                                                 | Diels-Alder chemistry between maleimide with furan                     | Cell survival, outgrowth, differentiation                                          | 251  |
| BMSCs                                 | E7 (CEPLQLKM)                                                                                                                                                                                                                                                         | Maleimide functionalized poly(carbonate ester)                       | Diels-Alder reaction, Michael-type addition (Maleimide-thiol reaction) | Cell adhesion, proliferation                                                       | 252  |
| <b>Other reactions</b>                |                                                                                                                                                                                                                                                                       |                                                                      |                                                                        |                                                                                    |      |
| Neural stem cells                     | C(K)GGYIGSR, C(K)GGRGD                                                                                                                                                                                                                                                | PSt, PLGA, Silica, Titanium surface                                  | Polydopamine coating, Michael type addition                            | Proliferation and differentiation                                                  | 253  |
| hADSCs                                | BMP-2 peptide (KIPKASSVPTELSAISTLYLGKK)                                                                                                                                                                                                                               | Polyurethan acrylate-polyglycidyl methacrylate nanopatterned surface | Epoxide-amine reaction                                                 | Cell differentiation into osteoblasts                                              | 254  |
| hADSCs                                | KIPKASSVPTELSAISTLYLGKK                                                                                                                                                                                                                                               | Poly(lactic-co-glycolic acid) PLGA scaffold                          | Polydopamine coating, Michael type addition                            | Cell differentiation into osteoblasts                                              | 201  |
| hESCs (H9, H7, H14, H1, IMR90-4)      | GAG-binding protein (GBP), GKKQRFRHRNRKG, GNGEPRGDTYRAY (BSP), GPQVTRGDVFTMP (VTN), GGKAFDITYVRLKF (C16), Cyco[RGD-D-FK(biotin-PEG-PEG)] (cRGD), GGCRRETAWAC (CRRETAWAC)                                                                                              | Streptavidin-coated dishes                                           | Avidin-biotin reaction                                                 | Differentiation into ectoderm, motor neuron, endoderm, mesoderm lineage            | 255  |
| Rat BMSCs                             | PPFLMLLKGSTR                                                                                                                                                                                                                                                          | Hyaluronic acid Hydrogels                                            | Carbonyldiimidazole (1,10-carbonyldiimidazole) reaction                | Cell viability, cell adhesion, Regeneration of spinal cord tissue in rat SCI model | 104  |
| UCB-MSCs (3D)                         | GHK peptide (GGGGGHKSP)                                                                                                                                                                                                                                               | Oxidized alginate (Alginate di-aldehyde, ADA)                        | Aldehyde-amine reaction                                                | Cell viability, differentiation into osteoblasts                                   | 120  |
| Human periodontal ligament stem cells | SDSSD                                                                                                                                                                                                                                                                 | Sodium alginate/gelatin/nano-hydroxyapatite hydrogels                | Physical Mixing                                                        | Osteogenic differentiation, bone formation, bone healing                           | 256  |
